# Supplementary material for: SOCS3 Attenuates GM-CSF/IFN-γ-Mediated Inflammation During Spontaneous Spinal Cord Regeneration
Source: PubMed Central journal article supplement (PMC7340708; doi:10.1007/s12264-020-00493-8), 2020-04-18
Supplement: 12264_2020_493_MOESM1_ESM.pdf [file 12264_2020_493_MOESM1_ESM.pdf]

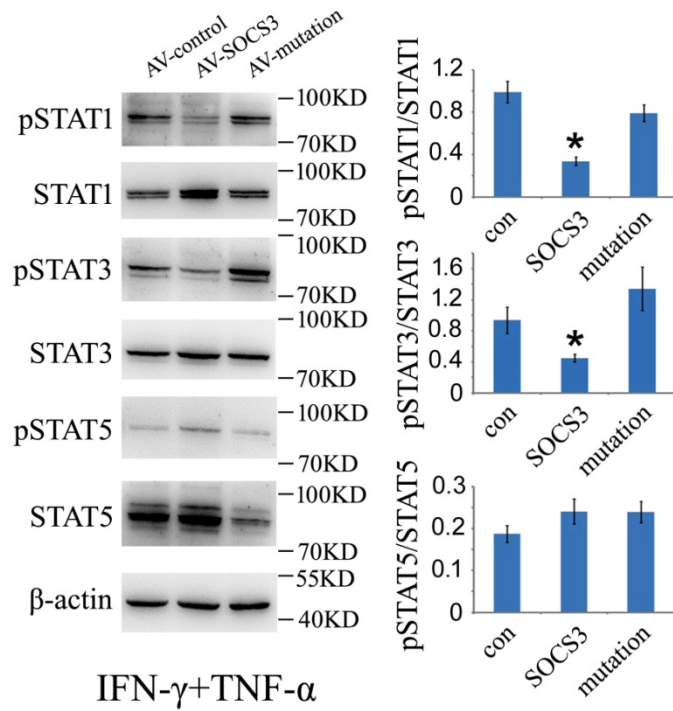

**Fig. S1** gSOCS3 negatively regulates the phosphorylation of STAT1/3/5 through the KIR domain. Macrophages were transfected with GV314-SOCS3 or GV314-mSOCS3 (F4A in KIR domain) adenovirus for 48 h before treatment with combinations of 10 ng/mL IFN- $\gamma$  and 10 ng/mL TNF- $\alpha$  for 2 h. Phosphorylation of STAT1/3/5 was determined by Western blot. Data are expressed as the mean  $\pm$  SEM; \* $p < 0.05$ .

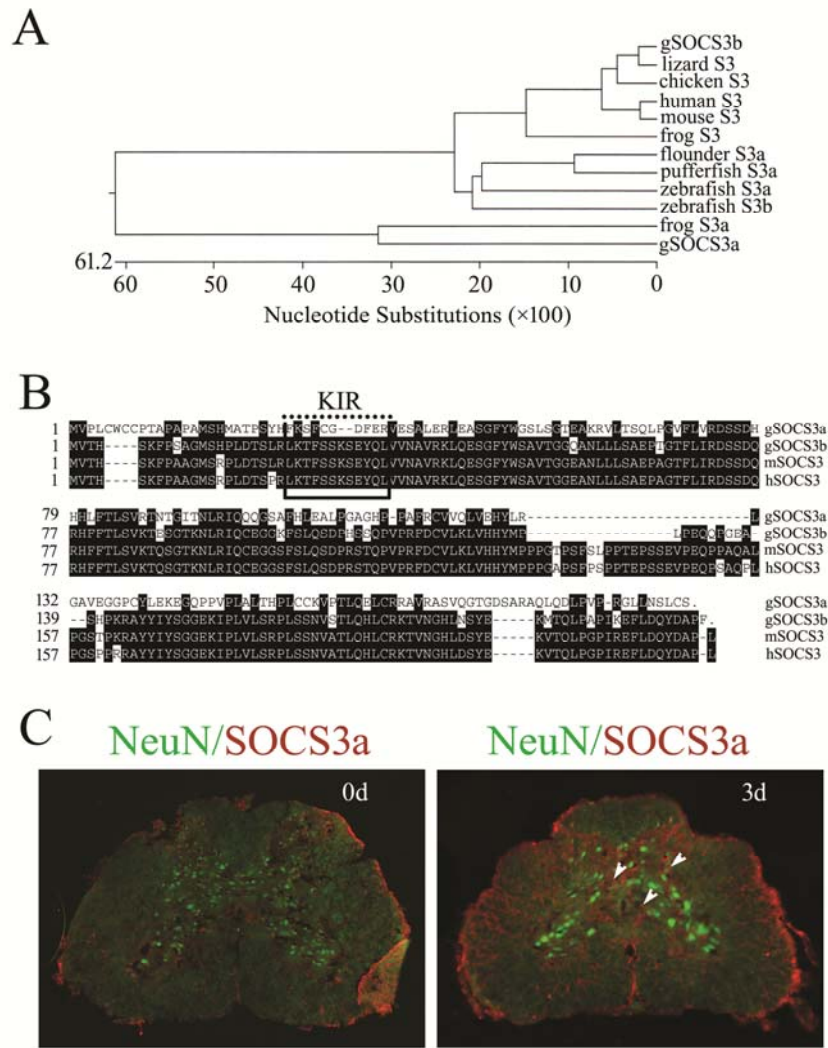

**Fig. S2** Analysis of two subtypes of gecko SOCS3 and the distribution of gSOCS3a in the neurons of injured gecko spinal cord. **A** Phylogenetic tree of SOCS3 proteins from representative species constructed by the neighbor-joining method in the PHYLIP 3.5c package. The sequences from GenBank are gecko *Gekko japonicus* SOCS3a (XP\_015269902); flounder *Paralichthys olivaceus* SOCS3a (BAW03226); pufferfish *Tetraodon nigroviridis* SOCS3a (ABC60040); frog *Xenopus laevis* SOCS3a (XP\_018081848); and zebrafish *Danio rerio* SOCS3a (NP\_956244). For other sequences, refer to Fig. 3. **B** Sequence alignment of gecko, mouse, and human SOCS3

proteins. C Representative images of the distribution of gSOCS3a in the neurons of injured gecko spinal cord at 0 and 3 days after tail amputation. Arrowheads indicate positive signals.
